# Supplementary material for: Beknopte verklaring van den katechismus of christelijke leer
Source: PLOS journal article supplement (doi:10.1371/journal.pcbi.1000221), 1911-01-01
Supplement: S1 (10.1371/journal.pcbi.1000221.s001) [file journal.pcbi.1000221.s001]

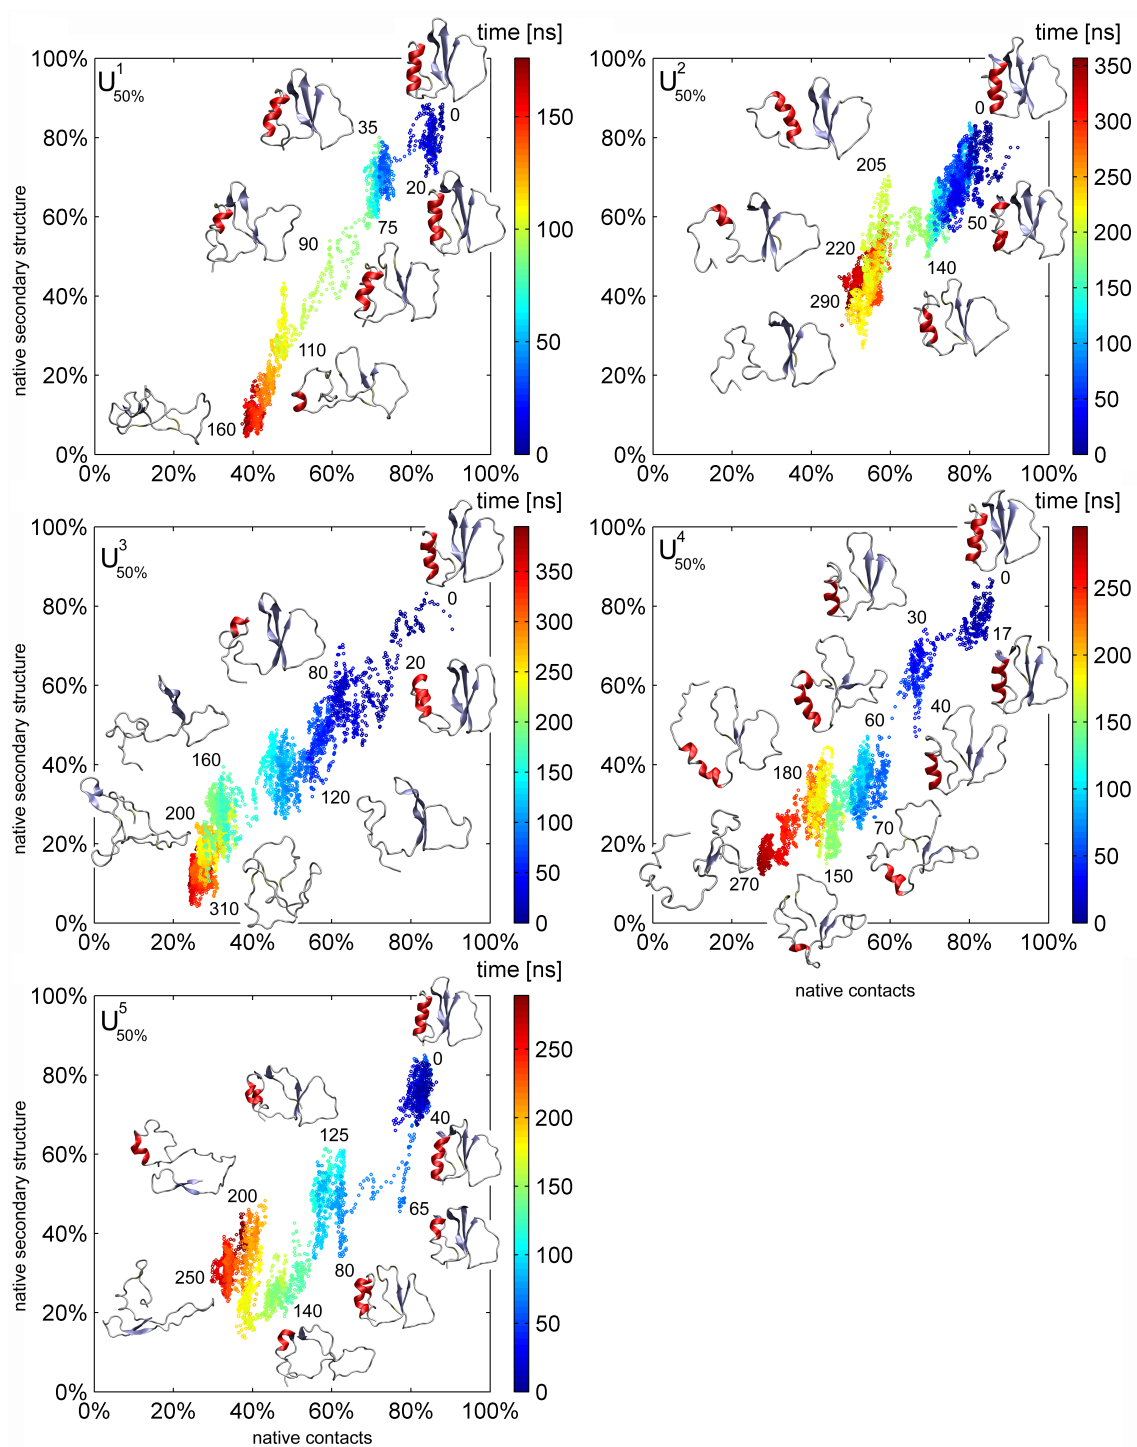

FIGURE S2. Unfolding pathways of the CI2 for the simulations in urea<sub>50%</sub>, displayed as native secondary structure content versus native contact content. The numbers next to the protein structures denote the respective time of the snapshot in ns.
