# Supplementary material for: Beknopte verklaring van den katechismus of christelijke leer
Source: PLOS journal article supplement (doi:10.1371/journal.pcbi.1000221), 1911-01-01
Supplement: S2 (10.1371/journal.pcbi.1000221.s002) [file journal.pcbi.1000221.s002]

Aggregation was quantified for hypopolar urea by calculating the urea *distribution entropy*,

$$S_{dist} = - \int dV \rho(x, y, z) \log \rho(x, y, z) \quad ,$$

where  $V$  is the box volume, and  $\rho(x, y, z)$  the local urea density after kernel density estimation. The width of the gaussian kernel function was chosen such that the full-width-half-maximum was equal to the average distance of  $N$  equidistantly distributed particles in the volume  $V$ , where  $N$  was given by the number of urea molecules. The distribution heterogeneity  $H_{dist}$  for a distribution  $X$  was then calculated by

$$H_{dist}(X) = \frac{S_{dist}(X) - S_{dist}^{max}}{S_{dist}^{min} - S_{dist}^{max}} \quad ,$$

where  $S_{dist}^{max}$  and  $S_{dist}^{min}$  are the maximum distribution entropy (given by a completely homogeneous distribution of particles) and the minimum distribution entropy (given by a  $\delta$ -distribution of particles), respectively.

To investigate possible artifacts from self-diffusion slowdown for hyperpolar urea, the urea self-diffusion coefficient was calculated via the mean-square-displacement  $D$  of urea molecules.

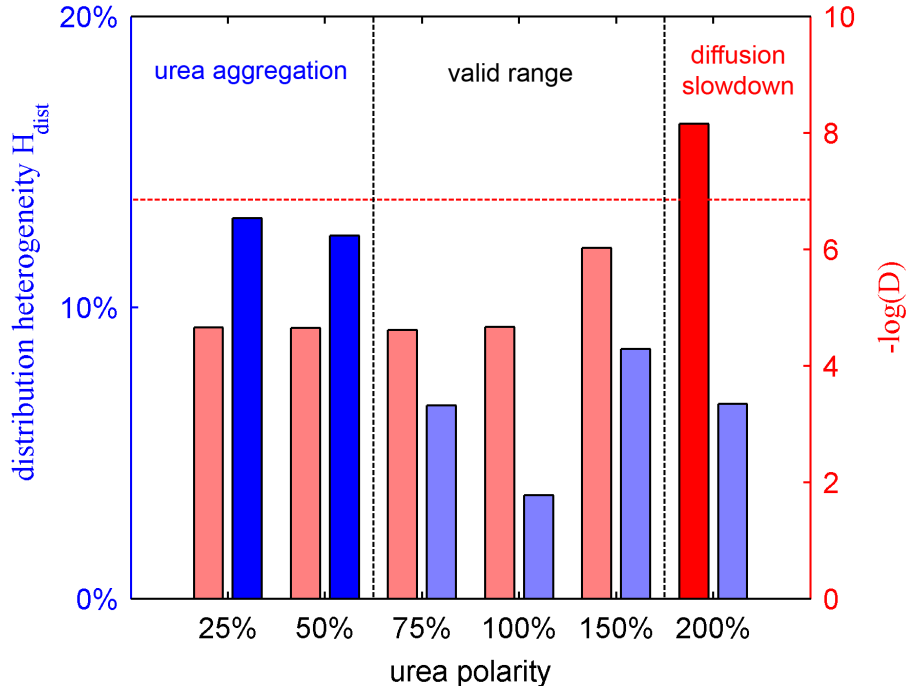

FIGURE S1. Side-effects of urea partial charge scaling. At 200 % partial charge scaling, urea self-diffusion (red bars) is more than an order of magnitude too slow to cross the box-length within the simulation time (indicated by the red dashed line). Scaling of the partial charge to 25 % and 50 % induces a significant degree of urea aggregation, as indicated by the urea distribution heterogeneity (blue bars).
